# Supplementary material for: Neuroinduction and neuroprotection co-enhanced spinal cord injury repair based on IL-4@ZIF-8-loaded hyaluronan–collagen hydrogels with nano-aligned and viscoelastic cues
Source: Royal Society of Chemistry journal article supplement (doi:10.1039/d2tb01111e), 2022-01-01
Supplement: d2tb01111e1.pdf [file d2tb01111e1.pdf]

## Electronic Supplementary Information

### **Neuroinduction and neuroprotection co-enhanced spinal cord injury repair based on IL-4@ZIF-8-loaded hyaluronan-collagen hydrogels with nano- aligned and viscoelastic cues**

Nini Xin,<sup>‡a</sup> Xiaoyin Liu,<sup>‡b</sup> Suping Chen,<sup>a</sup> Yusheng Zhang,<sup>a</sup> Dan Wei,<sup>a</sup> Jing Sun,<sup>a</sup> Liangxue Zhou,<sup>b</sup>  
Chengheng Wu<sup>\*a,c</sup> and Hongsong Fan<sup>\*a</sup>

<sup>a</sup> National Engineering Research Center for Biomaterials, College of Biomedical Engineering,  
Sichuan University, Chengdu 610064, Sichuan, China.

Email: hsfan@scu.edu.cn

<sup>b</sup> Department of Neurosurgery, West China School of Medicine, West China Hospital, Sichuan  
University, Chengdu 610041, Sichuan, China.

<sup>c</sup> Institute of Regulatory Science for Medical Devices, Sichuan University, Chengdu 610065,  
Sichuan, China.

Email: chwu@scu.edu.cn

\* Corresponding authors

‡ These authors contributed equally to this work.

Supplementary Figure S1:

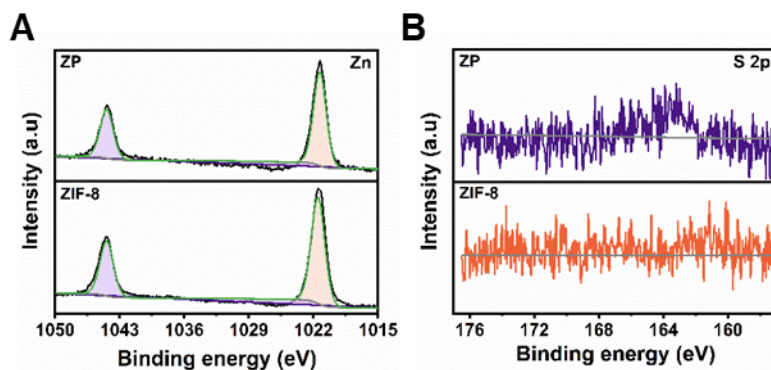

**Fig. S1.** (A) Zn 2p and (B) S 2p spectra of ZIF-8 and ZP NPs according to XPS.

Supplementary Figure S2:

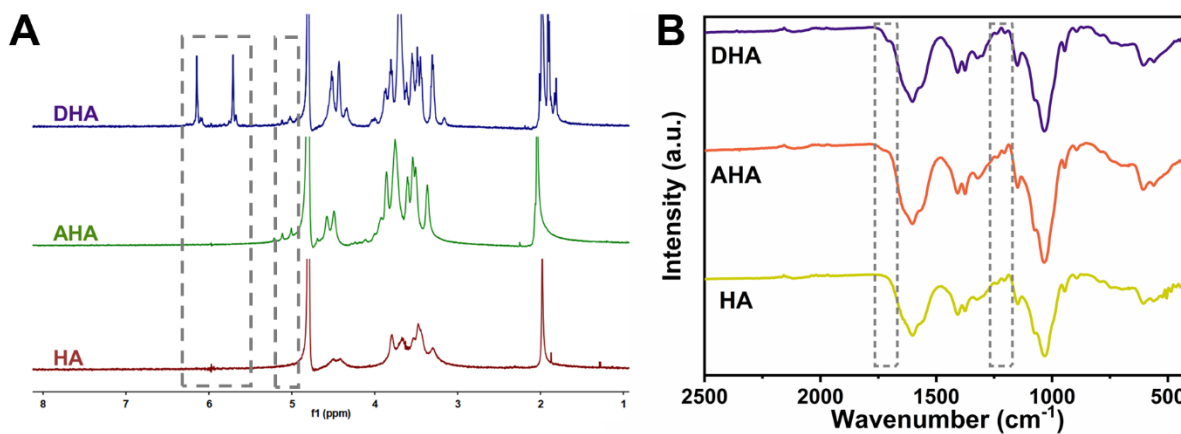

**Fig. S2.** The <sup>1</sup>H NMR spectra (A) and FTIR spectra (B) of HA, aldehyde groups-modified HA (AHA) and HA double-modified with methacrylate and aldehyde groups (DHA).
